# Supplementary material
Source: PubMed Central journal article supplement (PMC7554059)
Supplement: NIHMS1595539-supplement-Table_S2.pdf [file NIHMS1595539-supplement-Table_S2.pdf]

**Supporting Information Table S2. HPV transcript-positive oropharyngeal HNSCCs in TCGA**

| Patient ID   | Age | Sex | Primary Tumor Site | 8th edition clinical TNM† | 8th edition overall† | Smoking Category* | Number of mutations | Survival (Years) | Survival Status | Disease Free Survival (Years) | Disease Free Status |
|--------------|-----|-----|--------------------|---------------------------|----------------------|-------------------|---------------------|------------------|-----------------|-------------------------------|---------------------|
| TCGA_BA_4077 | 45  | F   | Tongue Base        | T4N3M0                    | III                  | 4                 | 286                 | 3.107            | Deceased        | 0.003                         | Recurred/Progressed |
| TCGA_BA_5153 | 51  | M   | Tonsil             | T2N1M0                    | I                    | 1                 | 56                  | 4.827            | Deceased        | 4.827                         | Recurred/Progressed |
| TCGA_BA_5559 | 71  | M   | Tonsil             | T3N1M0                    | II                   | 1                 | 96                  | 5.707            | Deceased        | 5.707                         | Recurred/Progressed |
| TCGA_BA_A4IG | 77  | M   | Tongue Base        | Unavailable               | Unavailable          | 3                 | 106                 | 2.342            | Living          | 2.342                         | DiseaseFree         |
| TCGA_BA_A4IH | 57  | M   | Tonsil             | T2N1M0                    | I                    | 4                 | 49                  | 1.704            | Living          | 1.704                         | DiseaseFree         |
| TCGA_BB_4223 | 48  | M   | Tonsil             | T3N1M0                    | II                   | 1                 | 296                 | 8.825            | Living          | 8.825                         | DiseaseFree         |
| TCGA_BB_4225 | 73  | M   | Tongue Base        | T3N2M0                    | II                   | 4                 | 75                  | 0.4              | Living          | 0.4                           | DiseaseFree         |
| TCGA_BB_4228 | 50  | M   | Tongue Base        | T2N0M0                    | I                    | 2                 | 59                  | 1.529            | Living          | 1.529                         | DiseaseFree         |
| TCGA_BB_7861 | 56  | M   | Tongue Base        | T1N1M0                    | I                    | 2                 | Unavailable         | 1.868            | Living          | 1.868                         | DiseaseFree         |
| TCGA_BB_7866 | 40  | M   | Tonsil             | T3N1M0                    | II                   | 4                 | Unavailable         | 3.748            | Living          | 3.748                         | DiseaseFree         |
| TCGA_BB_A6UM | 52  | M   | Tonsil             | Unavailable               | Unavailable          | 4                 | 59                  | 1.077            | Living          | 1.077                         | DiseaseFree         |
| TCGA_CN_5374 | 56  | F   | Tonsil             | Unavailable               | Unavailable          | 2                 | 155                 | 4.745            | Deceased        | 4.745                         | Recurred/Progressed |
| TCGA_CN_A499 | 60  | F   | Tonsil             | T1N0M0                    | I                    | 1                 | 40                  | 1.964            | Living          | 1.964                         | DiseaseFree         |
| TCGA_CN_A49C | 67  | M   | Tonsil             | T4N1M0                    | III                  | 3                 | 47                  | 1.767            | Living          | 1.767                         | DiseaseFree         |
| TCGA_CN_A6UY | 57  | M   | Tongue Base        | T3N1M0                    | II                   | 4                 | 37                  | 1.953            | Living          | 1.953                         | DiseaseFree         |
| TCGA_CN_A6V1 | 59  | M   | Tonsil             | T2N1M0                    | I                    | 1                 | 336                 | 1.652            | Living          | 1.652                         | DiseaseFree         |
| TCGA_CN_A6V6 | 59  | M   | Tongue Base        | T2N1M0                    | I                    | 4                 | 74                  | 1.74             | Living          | 1.74                          | DiseaseFree         |
| TCGA_CN_A6V7 | 40  | M   | Tonsil             | T2N1M0                    | I                    | 1                 | 49                  | 1.627            | Living          | 1.627                         | DiseaseFree         |
| TCGA_CR_5243 | 51  | M   | Tonsil             | T3N1M0                    | II                   | 1                 | 75                  | 7.019            | Living          | 7.019                         | DiseaseFree         |
| TCGA_CR_5248 | 53  | M   | Tonsil             | T4N2M0                    | III                  | 2                 | 308                 | 4.556            | Living          | 4.556                         | Recurred/Progressed |
| TCGA_CR_5249 | 35  | F   | Tonsil             | T2N0M0                    | I                    | 1                 | 46                  | 3.156            | Living          | 3.156                         | DiseaseFree         |
| TCGA_CR_5250 | 71  | M   | Tongue Base        | T2N0M0                    | I                    | 2                 | 38                  | 2.189            | Living          | 2.189                         | DiseaseFree         |
| TCGA_CR_6467 | 59  | M   | Tonsil             | T2N1M0                    | I                    | 4                 | 43                  | 4.868            | Living          | 4.868                         | DiseaseFree         |
| TCGA_CR_6470 | 38  | M   | Tonsil             | T1N2M0                    | II                   | 1                 | 43                  | 4.167            | Living          | 4.167                         | DiseaseFree         |
| TCGA_CR_6472 | 59  | M   | Tongue Base        | T2N3M0                    | III                  | 1                 | 415                 | 2.877            | Living          | 2.877                         | DiseaseFree         |
| TCGA_CR_6480 | 53  | M   | Tonsil             | T2N1M0                    | I                    | 1                 | 101                 | 0.992            | Living          | 0.992                         | DiseaseFree         |
| TCGA_CR_6481 | 47  | M   | Tonsil             | T2N1M0                    | I                    | 1                 | 434                 | 0.852            | Living          | 0.852                         | DiseaseFree         |
| TCGA_CR_6482 | 62  | M   | Tonsil             | T2N1M0                    | I                    | 4                 | 41                  | 0.945            | Living          | 0.945                         | DiseaseFree         |
| TCGA_CR_6487 | 50  | M   | Tonsil             | T2N0M0                    | I                    | 4                 | 124                 | 0.641            | Living          | 0.641                         | DiseaseFree         |
| TCGA_CR_7385 | 42  | M   | Tonsil             | T2N1M0                    | I                    | 3                 | 47                  | 2.732            | Living          | 2.732                         | DiseaseFree         |
| TCGA_CR_7404 | 53  | M   | Tonsil             | T3N1M0                    | II                   | 1                 | 105                 | 4.033            | Deceased        | 4.033                         | Recurred/Progressed |
| TCGA_CV_7406 | 49  | M   | Tongue Base        | T2N0M0                    | I                    | 4                 | 174                 | 4.789            | Deceased        | Unavailable                   | Unavailable         |
| TCGA_DQ_7590 | 51  | M   | Tonsil             | T1N1M0                    | I                    | 3                 | Unavailable         | 3.871            | Living          | 3.871                         | DiseaseFree         |
| TCGA_DQ_7591 | 62  | M   | Tongue Base        | T4N1M0                    | III                  | 3                 | 36                  | 1.704            | Living          | 1.704                         | DiseaseFree         |
| TCGA_DQ_7593 | 58  | M   | Tongue Base        | T4N1M0                    | III                  | 2                 | 41                  | 3.353            | Living          | 3.353                         | DiseaseFree         |
| TCGA_DQ_7594 | 47  | M   | Tongue Base        | T4N3M0                    | III                  | 1                 | Unavailable         | 3.337            | Living          | 3.337                         | Recurred/Progressed |
| TCGA_DQ_7596 | 48  | M   | Tonsil             | T2N1M0                    | I                    | 1                 | 37                  | 3.466            | Living          | 3.466                         | Recurred/Progressed |
| TCGA_H7_A76A | 57  | M   | Tonsil             | T2N1M0                    | I                    | 4                 | 72                  | 1.745            | Living          | 1.745                         | DiseaseFree         |

**Supporting Information Table S2. HPV transcript-positive oropharyngeal HNSCCs in TCGA**

| Patient ID   | Age | Sex | Primary Tumor Site | 8th edition clinical TNM† | 8th edition overall† | Smoking Category* | Number of mutations | Survival (Years) | Survival Status | Disease Free Survival (Years) | Disease Free Status |
|--------------|-----|-----|--------------------|---------------------------|----------------------|-------------------|---------------------|------------------|-----------------|-------------------------------|---------------------|
| TCGA_HD_7754 | 69  | M   | Tonsil             | T2N1M0                    | I                    | 4                 | 56                  | 2.145            | Living          | 2.145                         | DiseaseFree         |
| TCGA_HD_8314 | 58  | M   | Tongue Base        | T1N1M0                    | I                    | 1                 | 64                  | 1.836            | Living          | 1.836                         | DiseaseFree         |
| TCGA_HD_A634 | 56  | M   | Tonsil             | T3N1M0                    | II                   | 2                 | 43                  | 0.356            | Deceased        | 0.356                         | Recurred/Progressed |
| TCGA_IQ_A61I | 63  | M   | Oropharynx         | T1N1M0                    | I                    | 1                 | 124                 | 0.005            | Deceased        | 0.005                         | DiseaseFree         |
| TCGA_KU_A6H7 | 55  | F   | Tonsil             | T2N1M0                    | I                    | 4                 | 151                 | 1.605            | Living          | 1.605                         | DiseaseFree         |
| TCGA_MZ_A5BI | 53  | M   | Tonsil             | T2N1M0                    | I                    | Unavailable       | 40                  | 0.595            | Deceased        | Unavailable                   | Unavailable         |
| TCGA_MZ_A6I9 | 68  | M   | Tongue Base        | T4N1M0                    | III                  | 3                 | 42                  | 1.34             | Deceased        | 1.34                          | Recurred/Progressed |
| TCGA_P3_A5Q5 | 54  | M   | Tonsil             | Unavailable               | Unavailable          | 4                 | 255                 | 2.493            | Living          | 2.493                         | DiseaseFree         |
| TCGA_P3_A5QE | 49  | M   | Tongue Base        | T1N1M0                    | I                    | 1                 | 42                  | 4.271            | Living          | 4.271                         | DiseaseFree         |
| TCGA_P3_A6SW | 50  | M   | Tonsil             | T4N1M0                    | III                  | 2                 | 96                  | 3.068            | Living          | 3.068                         | DiseaseFree         |
| TCGA_QK_A6IF | 61  | M   | Tonsil             | T1N1M0                    | I                    | 1                 | 27                  | 1.929            | Living          | 1.929                         | Recurred/Progressed |
| TCGA_QK_A6V9 | 56  | M   | Tonsil             | T2N0M0                    | I                    | 1                 | 75                  | 2.282            | Living          | 2.282                         | DiseaseFree         |
| TCGA_RS_A6TP | 58  | M   | Tonsil             | T2N0M0                    | I                    | 4                 | 122                 | 1.414            | Living          | 1.414                         | DiseaseFree         |
| TCGA_T2_A6X0 | 49  | M   | Tonsil             | T1N1M0                    | I                    | 4                 | 59                  | 0.592            | Living          | 0.592                         | DiseaseFree         |
| TCGA_TN_A7HI | 56  | M   | Tonsil             | T1N0M0                    | I                    | 2                 | 63                  | 1.129            | Living          | 1.129                         | DiseaseFree         |
