# Supplementary material
Source: PubMed Central journal article supplement (PMC7554059)
Supplement: NIHMS1595539-supplement-Table_S12.pdf [file NIHMS1595539-supplement-Table_S12.pdf]

**Supporting Information Table S12. ROC-based cutoff analysis of TMB for prediction of 5-year OS in HPV- TCGA cases.**

| <b>TMB Cut point (&gt;)</b> | <b>Sensitivity%</b> | <b>Specificity%</b> | <b>Youden's Index</b> |
|-----------------------------|---------------------|---------------------|-----------------------|
| 7.5                         | 100                 | 0.3876              | 99.3876               |
| 10                          | 99.46               | 0.3876              | 98.8476               |
| 12                          | 99.46               | 0.7752              | 99.2352               |
| 14                          | 99.46               | 1.163               | 99.623                |
| 17                          | 99.46               | 1.55                | 100.01                |
| 21.5                        | 99.46               | 1.938               | 100.398               |
| 24.5                        | 98.92               | 2.326               | 100.246               |
| 25.5                        | 98.92               | 2.713               | 100.633               |
| 27                          | 98.38               | 2.713               | 100.093               |
| 29                          | 98.38               | 3.101               | 100.481               |
| 31.5                        | 98.38               | 3.488               | 100.868               |
| 33.5                        | 97.84               | 3.488               | 100.328               |
| 34.5                        | 97.84               | 3.876               | 100.716               |
| 35.5                        | 97.84               | 5.039               | 101.879               |
| 36.5                        | 97.84               | 5.814               | 102.654               |
| 37.5                        | 97.84               | 6.202               | 103.042               |
| 39.5                        | 97.3                | 6.202               | 102.502               |
| 41.5                        | 97.3                | 6.589               | 102.889               |
| 42.5                        | 97.3                | 6.977               | 103.277               |
| 43.5                        | 96.22               | 7.752               | 102.972               |
| 45                          | 95.68               | 7.752               | 102.432               |
| 46.5                        | 95.68               | 8.14                | 102.82                |
| 47.5                        | 94.59               | 9.302               | 102.892               |
| 48.5                        | 94.59               | 9.69                | 103.28                |
| 49.5                        | 94.05               | 10.47               | 103.52                |
| 50.5                        | 94.05               | 10.85               | 103.9                 |
| 51.5                        | 93.51               | 11.63               | 104.14                |
| 52.5                        | 92.97               | 11.63               | 103.6                 |
| 53.5                        | 92.43               | 11.63               | 103.06                |
| 54.5                        | 92.43               | 12.02               | 103.45                |
| 56                          | 91.89               | 12.4                | 103.29                |
| 57.5                        | 89.73               | 13.57               | 102.3                 |

**Supporting Information Table S12. ROC-based cutoff analysis of TMB for prediction of 5-year OS in HPV- TCGA cases.**

| <b>TMB Cut point (&gt;)</b> | <b>Sensitivity%</b> | <b>Specificity%</b> | <b>Youden's Index</b> |
|-----------------------------|---------------------|---------------------|-----------------------|
| 58.5                        | 88.65               | 13.95               | 101.6                 |
| 59.5                        | 88.11               | 13.95               | 101.06                |
| 60.5                        | 87.57               | 14.73               | 101.3                 |
| 61.5                        | 87.57               | 15.5                | 102.07                |
| 62.5                        | 87.57               | 16.28               | 102.85                |
| 63.5                        | 87.03               | 16.67               | 102.7                 |
| 65                          | 86.49               | 17.05               | 102.54                |
| 66.5                        | 84.86               | 17.83               | 101.69                |
| 67.5                        | 83.78               | 20.16               | 102.94                |
| 68.5                        | 83.24               | 21.71               | 103.95                |
| 69.5                        | 82.16               | 22.87               | 104.03                |
| 70.5                        | 81.08               | 22.87               | 102.95                |
| 71.5                        | 80.54               | 23.26               | 102.8                 |
| 72.5                        | 80.54               | 23.64               | 103.18                |
| 73.5                        | 80.54               | 25.19               | 104.73                |
| 74.5                        | 79.46               | 25.97               | 104.43                |
| 75.5                        | 79.46               | 26.36               | 104.82                |
| 76.5                        | 79.46               | 27.52               | 105.98                |
| 78                          | 78.92               | 27.91               | 105.83                |
| 79.5                        | 78.38               | 28.29               | 105.67                |
| 80.5                        | 78.38               | 29.46               | 106.84                |
| 81.5                        | 77.3                | 30.23               | 106.53                |
| 82.5                        | 76.76               | 30.62               | 106.38                |
| 83.5                        | 76.22               | 31.78               | 107                   |
| 84.5                        | 76.22               | 32.56               | 107.78                |
| 85.5                        | 76.22               | 33.72               | 108.94                |
| 86.5                        | 75.68               | 34.5                | 109.18                |
| 87.5                        | 75.14               | 35.27               | 109.41                |
| 88.5                        | 75.14               | 35.66               | 109.8                 |
| 89.5                        | 73.51               | 36.43               | 108.94                |
| 90.5                        | 72.43               | 36.43               | 107.86                |
| 91.5                        | 70.81               | 38.37               | 108.18                |

**Supporting Information Table S12. ROC-based cutoff analysis of TMB for prediction of 5-year OS in HPV- TCGA cases.**

| <b>TMB Cut point (&gt;)</b> | <b>Sensitivity%</b> | <b>Specificity%</b> | <b>Youden's Index</b> |
|-----------------------------|---------------------|---------------------|-----------------------|
| 92.5                        | 70.27               | 38.37               | 107.64                |
| 93.5                        | 70.27               | 39.53               | 108.8                 |
| 94.5                        | 69.73               | 39.92               | 108.65                |
| 95.5                        | 68.65               | 41.86               | 109.51                |
| 96.5                        | 68.11               | 41.86               | 108.97                |
| 97.5                        | 67.03               | 42.25               | 108.28                |
| 98.5                        | 67.03               | 43.8                | 109.83                |
| <b>99.5</b>                 | <b>67.03</b>        | <b>44.19</b>        | <b>110.22</b>         |
| 100.5                       | 65.95               | 44.96               | 109.91                |
| 101.5                       | 63.78               | 45.35               | 108.13                |
| 102.5                       | 63.24               | 45.35               | 107.59                |
| 103.5                       | 62.7                | 46.12               | 107.82                |
| 104.5                       | 60                  | 46.9                | 105.9                 |
| 105.5                       | 59.46               | 48.06               | 106.52                |
| 106.5                       | 57.84               | 48.84               | 105.68                |
| 107.5                       | 57.3                | 49.22               | 105.52                |
| 108.5                       | 56.22               | 50                  | 105.22                |
| 109.5                       | 55.14               | 50                  | 104.14                |
| 110.5                       | 54.05               | 51.16               | 104.21                |
| 111.5                       | 51.89               | 53.1                | 103.99                |
| 112.5                       | 51.35               | 53.1                | 103.45                |
| 113.5                       | 50.81               | 54.26               | 104.07                |
| 115                         | 49.19               | 55.81               | 104                   |
| 116.5                       | 48.11               | 56.59               | 103.7                 |
| 117.5                       | 47.57               | 58.14               | 104.71                |
| 119                         | 47.03               | 58.53               | 104.56                |
| 120.5                       | 46.49               | 58.53               | 104.02                |
| 121.5                       | 45.95               | 59.69               | 104.64                |
| 122.5                       | 45.41               | 60.08               | 104.49                |
| 123.5                       | 43.78               | 60.08               | 102.86                |
| 124.5                       | 43.78               | 61.24               | 104.02                |
| 125.5                       | 43.24               | 61.24               | 103.48                |

**Supporting Information Table S12. ROC-based cutoff analysis of TMB for prediction of 5-year OS in HPV- TCGA cases.**

| <b>TMB Cut point (&gt;)</b> | <b>Sensitivity%</b> | <b>Specificity%</b> | <b>Youden's Index</b> |
|-----------------------------|---------------------|---------------------|-----------------------|
| 126.5                       | 42.7                | 61.63               | 103.33                |
| 128                         | 42.7                | 62.4                | 104.1                 |
| 129.5                       | 42.16               | 62.79               | 103.95                |
| 131                         | 41.62               | 63.18               | 103.8                 |
| 132.5                       | 41.08               | 63.18               | 103.26                |
| 133.5                       | 40.54               | 64.34               | 103.88                |
| 134.5                       | 40.54               | 64.73               | 104.27                |
| 135.5                       | 40                  | 65.5                | 104.5                 |
| 136.5                       | 40                  | 66.28               | 105.28                |
| 137.5                       | 39.46               | 67.05               | 105.51                |
| 139.5                       | 37.84               | 68.22               | 105.06                |
| 141.5                       | 37.84               | 68.6                | 105.44                |
| 142.5                       | 37.3                | 70.16               | 106.46                |
| 143.5                       | 37.3                | 70.93               | 107.23                |
| 144.5                       | 36.22               | 72.09               | 107.31                |
| 145.5                       | 35.68               | 72.87               | 107.55                |
| 146.5                       | 35.14               | 73.26               | 107.4                 |
| 147.5                       | 35.14               | 74.03               | 108.17                |
| 148.5                       | 34.05               | 74.03               | 107.08                |
| 150                         | 32.97               | 74.81               | 106.78                |
| 151.5                       | 32.43               | 74.81               | 106.24                |
| 152.5                       | 32.43               | 75.58               | 107.01                |
| 154                         | 31.89               | 75.97               | 106.86                |
| 155.5                       | 31.89               | 76.36               | 107.25                |
| 156.5                       | 31.35               | 76.74               | 107.09                |
| 157.5                       | 30.81               | 77.13               | 106.94                |
| 158.5                       | 30.81               | 77.52               | 107.33                |
| 159.5                       | 30.81               | 77.91               | 107.72                |
| 160.5                       | 30.81               | 78.29               | 108.1                 |
| 162                         | 29.73               | 78.68               | 107.41                |
| 163.5                       | 29.19               | 79.07               | 107.26                |
| 164.5                       | 28.65               | 79.07               | 106.72                |

**Supporting Information Table S12. ROC-based cutoff analysis of TMB for prediction of 5-year OS in HPV- TCGA cases.**

| <b>TMB Cut point (&gt;)</b> | <b>Sensitivity%</b> | <b>Specificity%</b> | <b>Youden's Index</b> |
|-----------------------------|---------------------|---------------------|-----------------------|
| 166                         | 28.11               | 79.07               | 106.18                |
| 167.5                       | 27.57               | 79.07               | 105.64                |
| 168.5                       | 27.03               | 79.07               | 105.1                 |
| 169.5                       | 26.49               | 79.07               | 104.56                |
| 171.5                       | 25.95               | 79.07               | 104.02                |
| 173.5                       | 25.95               | 79.46               | 104.41                |
| 174.5                       | 25.95               | 79.84               | 104.79                |
| 175.5                       | 24.32               | 79.84               | 103.16                |
| 176.5                       | 23.78               | 80.62               | 103.4                 |
| 177.5                       | 23.24               | 81.01               | 103.25                |
| 178.5                       | 22.7                | 81.01               | 102.71                |
| 179.5                       | 21.62               | 81.01               | 101.63                |
| 180.5                       | 21.08               | 81.4                | 101.48                |
| 181.5                       | 20.54               | 81.4                | 100.94                |
| 182.5                       | 20                  | 81.4                | 100.4                 |
| 184                         | 18.92               | 81.78               | 99.7                  |
| 185.5                       | 17.84               | 81.78               | 98.62                 |
| 187.5                       | 17.3                | 81.78               | 98.08                 |
| 191                         | 16.76               | 81.78               | 97.54                 |
| 195                         | 16.76               | 82.17               | 97.93                 |
| 197.5                       | 16.22               | 82.17               | 97.39                 |
| 199.5                       | 15.14               | 82.17               | 96.31                 |
| 203                         | 15.14               | 82.56               | 96.7                  |
| 205.5                       | 15.14               | 82.95               | 97.09                 |
| 206.5                       | 14.59               | 82.95               | 96.54                 |
| 208                         | 14.05               | 82.95               | 96                    |
| 210                         | 13.51               | 82.95               | 95.46                 |
| 211.5                       | 12.97               | 83.33               | 95.3                  |
| 212.5                       | 12.43               | 83.33               | 94.76                 |
| 214                         | 12.43               | 83.72               | 95.15                 |
| 215.5                       | 11.89               | 83.72               | 94.61                 |
| 217                         | 11.89               | 84.11               | 95                    |

**Supporting Information Table S12. ROC-based cutoff analysis of TMB for prediction of 5-year OS in HPV- TCGA cases.**

| <b>TMB Cut point (&gt;)</b> | <b>Sensitivity%</b> | <b>Specificity%</b> | <b>Youden's Index</b> |
|-----------------------------|---------------------|---------------------|-----------------------|
| 223                         | 11.89               | 84.5                | 95.39                 |
| 228.5                       | 11.35               | 84.88               | 95.23                 |
| 229.5                       | 11.35               | 85.27               | 95.62                 |
| 231.5                       | 11.35               | 85.66               | 96.01                 |
| 233.5                       | 10.81               | 85.66               | 95.47                 |
| 238.5                       | 10.27               | 85.66               | 94.93                 |
| 244                         | 9.73                | 85.66               | 94.39                 |
| 246                         | 9.73                | 86.05               | 94.78                 |
| 248                         | 9.73                | 86.43               | 95.16                 |
| 252.5                       | 9.73                | 86.82               | 95.55                 |
| 256.5                       | 9.73                | 87.21               | 95.94                 |
| 259                         | 8.649               | 87.21               | 94.859                |
| 261.5                       | 8.108               | 87.21               | 94.318                |
| 269.5                       | 7.027               | 87.21               | 93.237                |
| 279.5                       | 7.027               | 87.6                | 93.627                |
| 285                         | 6.486               | 87.98               | 93.466                |
| 291                         | 6.486               | 88.37               | 93.856                |
| 296                         | 6.486               | 88.76               | 94.246                |
| 301.5                       | 6.486               | 89.15               | 94.636                |
| 307.5                       | 6.486               | 89.53               | 95.016                |
| 312.5                       | 5.946               | 89.53               | 94.476                |
| 318                         | 5.946               | 89.92               | 94.866                |
| 323.5                       | 5.946               | 90.31               | 95.256                |
| 328                         | 5.946               | 90.7                | 95.646                |
| 330.5                       | 5.946               | 91.09               | 96.036                |
| 336                         | 5.946               | 91.47               | 96.416                |
| 342.5                       | 5.946               | 91.86               | 96.806                |
| 348.5                       | 5.405               | 91.86               | 96.265                |
| 355.5                       | 5.405               | 92.25               | 96.655                |
| 368                         | 4.865               | 92.25               | 96.115                |
| 383                         | 4.865               | 92.64               | 96.505                |
| 391                         | 4.865               | 93.02               | 96.885                |

**Supporting Information Table S12. ROC-based cutoff analysis of TMB for prediction of 5-year OS in HPV- TCGA cases.**

| <b>TMB Cut point (&gt;)</b> | <b>Sensitivity%</b> | <b>Specificity%</b> | <b>Youden's Index</b> |
|-----------------------------|---------------------|---------------------|-----------------------|
| 398                         | 4.324               | 93.02               | 96.344                |
| 405.5                       | 4.324               | 93.8                | 97.124                |
| 413.5                       | 4.324               | 94.19               | 97.514                |
| 426.5                       | 4.324               | 94.57               | 97.894                |
| 436                         | 3.784               | 94.57               | 97.354                |
| 441.5                       | 3.784               | 94.96               | 97.744                |
| 447.5                       | 3.784               | 95.35               | 98.134                |
| 452                         | 3.784               | 95.74               | 98.524                |
| 455.5                       | 3.243               | 95.74               | 97.983                |
| 459                         | 3.243               | 96.12               | 98.363                |
| 462.5                       | 3.243               | 96.51               | 98.753                |
| 467.5                       | 3.243               | 96.9                | 99.143                |
| 484.5                       | 3.243               | 97.29               | 99.533                |
| 509.5                       | 3.243               | 97.67               | 99.913                |
| 527.5                       | 2.703               | 97.67               | 99.373                |
| 549                         | 2.703               | 98.06               | 99.763                |
| 582                         | 2.162               | 98.06               | 99.222                |
| 607                         | 1.622               | 98.06               | 98.682                |
| 625                         | 1.622               | 98.45               | 99.072                |
| 641                         | 1.081               | 98.45               | 98.531                |
| 718.5                       | 0.5405              | 98.45               | 97.9905               |
| 825.5                       | 0.5405              | 98.84               | 98.3805               |
| 1193                        | 0.5405              | 99.22               | 98.7605               |
| 1716                        | 0.5405              | 99.61               | 99.1505               |
| 2545                        | 0                   | 99.61               | 98.61                 |
