# Supplementary material
Source: PubMed Central journal article supplement (PMC7554059)
Supplement: NIHMS1595539-supplement-Table_S13.pdf [file NIHMS1595539-supplement-Table_S13.pdf]

**Supporting Information Table S13. ROC analysis of 325 E2F target genes in TCGA\_C1 vs. TCGA\_C2**

| <b>Gene</b> | <b>AUC</b> | <b>Std. Error</b> | <b>95% confidence interval</b> | <b>p-value</b> |
|-------------|------------|-------------------|--------------------------------|----------------|
| PMF1        | 0.9487     | 0.03845           | 0.8733 to 1.000                | <0.0001        |
| CKS1B       | 0.9296     | 0.03341           | 0.8641 to 0.9951               | <0.0001        |
| FOXO3       | 0.9135     | 0.03773           | 0.8395 to 0.9874               | <0.0001        |
| SMARCA5     | 0.9076     | 0.0404            | 0.8284 to 0.9868               | <0.0001        |
| CBX5        | 0.9032     | 0.04264           | 0.8197 to 0.9868               | <0.0001        |
| CKS2        | 0.9018     | 0.04501           | 0.8135 to 0.9900               | <0.0001        |
| MAPK8       | 0.8974     | 0.04122           | 0.8166 to 0.9782               | <0.0001        |
| TACC1       | 0.8974     | 0.04313           | 0.8128 to 0.9819               | <0.0001        |
| BARD1       | 0.8871     | 0.04894           | 0.7912 to 0.9830               | <0.0001        |
| DYRK1A      | 0.8871     | 0.05159           | 0.7860 to 0.9882               | <0.0001        |
| SMARCA2     | 0.8812     | 0.04716           | 0.7888 to 0.9737               | <0.0001        |
| APAF1       | 0.8768     | 0.04765           | 0.7834 to 0.9702               | <0.0001        |
| AURKB       | 0.8754     | 0.04994           | 0.7775 to 0.9732               | <0.0001        |
| CDC20       | 0.8724     | 0.04951           | 0.7754 to 0.9695               | <0.0001        |
| DCK         | 0.871      | 0.04699           | 0.7789 to 0.9631               | <0.0001        |
| SIVA1       | 0.871      | 0.05297           | 0.7671 to 0.9748               | <0.0001        |
| MAP2K2      | 0.8695     | 0.05273           | 0.7662 to 0.9729               | <0.0001        |
| ARHGAP4     | 0.868      | 0.05512           | 0.7600 to 0.9761               | <0.0001        |
| AR          | 0.8636     | 0.05881           | 0.7484 to 0.9789               | <0.0001        |
| CD58        | 0.8636     | 0.05006           | 0.7655 to 0.9617               | <0.0001        |
| NPAT        | 0.8622     | 0.0596            | 0.7453 to 0.9790               | <0.0001        |
| RBL1        | 0.8622     | 0.05076           | 0.7627 to 0.9617               | <0.0001        |
| MCM4        | 0.8607     | 0.05591           | 0.7511 to 0.9703               | <0.0001        |
| MAP3K7      | 0.8592     | 0.05763           | 0.7463 to 0.9722               | <0.0001        |
| RECQL       | 0.8578     | 0.05507           | 0.7498 to 0.9657               | <0.0001        |
| TP53BP2     | 0.8555     | 0.05626           | 0.7453 to 0.9658               | <0.0001        |
| CCNE1       | 0.8475     | 0.06072           | 0.7285 to 0.9665               | <0.0001        |
| CDC25B      | 0.8475     | 0.0555            | 0.7387 to 0.9563               | <0.0001        |
| ATM         | 0.8446     | 0.05736           | 0.7321 to 0.9570               | <0.0001        |
| CITED2      | 0.8358     | 0.06252           | 0.7132 to 0.9583               | <0.0001        |
| GEM         | 0.8211     | 0.05861           | 0.7062 to 0.9360               | <0.0001        |
| NUP155      | 0.8211     | 0.06332           | 0.6970 to 0.9452               | <0.0001        |
| PTTG1       | 0.8167     | 0.05809           | 0.7029 to 0.9306               | <0.0001        |
| BCL2        | 0.8123     | 0.05907           | 0.6965 to 0.9281               | 0.0001         |
| BACH1       | 0.8109     | 0.06185           | 0.6896 to 0.9321               | 0.0001         |
| INHBA       | 0.8065     | 0.0661            | 0.6769 to 0.9360               | 0.0002         |
| UBE2C       | 0.8065     | 0.06049           | 0.6879 to 0.9250               | 0.0001         |

**Supporting Information Table S13. ROC analysis of 325 E2F target genes in TCGA\_C1 vs. TCGA\_C2**

| <b>Gene</b> | <b>AUC</b> | <b>Std. Error</b> | <b>95% confidence interval</b> | <b>p-value</b> |
|-------------|------------|-------------------|--------------------------------|----------------|
| FGFR2       | 0.805      | 0.06357           | 0.6804 to 0.9296               | 0.0002         |
| UBE2T       | 0.805      | 0.06053           | 0.6864 to 0.9237               | 0.0001         |
| VEGFB       | 0.8022     | 0.06481           | 0.6752 to 0.9293               | 0.0002         |
| DIABLO      | 0.8021     | 0.05973           | 0.6850 to 0.9191               | 0.0002         |
| CCNG2       | 0.7991     | 0.06063           | 0.6803 to 0.9180               | 0.0002         |
| MYB         | 0.7962     | 0.06848           | 0.6620 to 0.9304               | 0.0003         |
| BAK1        | 0.7947     | 0.06151           | 0.6742 to 0.9153               | 0.0003         |
| MAP3K5      | 0.7933     | 0.06519           | 0.6655 to 0.9210               | 0.0003         |
| CENPA       | 0.7918     | 0.06735           | 0.6598 to 0.9238               | 0.0003         |
| RPA3        | 0.7918     | 0.06283           | 0.6686 to 0.9149               | 0.0003         |
| BRCA1       | 0.7889     | 0.06432           | 0.6628 to 0.9149               | 0.0004         |
| DHPS        | 0.7889     | 0.06192           | 0.6675 to 0.9102               | 0.0004         |
| KIF22       | 0.7882     | 0.06522           | 0.6604 to 0.9161               | 0.0003         |
| H2AFX       | 0.7874     | 0.06676           | 0.6565 to 0.9182               | 0.0004         |
| MAPK1       | 0.7874     | 0.06855           | 0.6530 to 0.9218               | 0.0004         |
| MMP16       | 0.7859     | 0.06401           | 0.6605 to 0.9114               | 0.0004         |
| DHFR        | 0.7845     | 0.06638           | 0.6544 to 0.9146               | 0.0005         |
| SKP2        | 0.783      | 0.07077           | 0.6443 to 0.9217               | 0.0005         |
| CDC45       | 0.7815     | 0.0644            | 0.6553 to 0.9077               | 0.0005         |
| H2AFZ       | 0.7815     | 0.06827           | 0.6477 to 0.9153               | 0.0005         |
| ACOX1       | 0.7771     | 0.06427           | 0.6512 to 0.9031               | 0.0006         |
| TANK        | 0.7757     | 0.06328           | 0.6516 to 0.8997               | 0.0007         |
| FIGNL1      | 0.7742     | 0.06671           | 0.6434 to 0.9049               | 0.0007         |
| TOP2A       | 0.7742     | 0.06746           | 0.6420 to 0.9064               | 0.0006         |
| BCL2L11     | 0.7698     | 0.0666            | 0.6393 to 0.9003               | 0.0009         |
| EGR1        | 0.7698     | 0.0646            | 0.6432 to 0.8964               | 0.0009         |
| LIMA1       | 0.7698     | 0.07274           | 0.6272 to 0.9124               | 0.0009         |
| PMS2L1      | 0.7698     | 0.06679           | 0.6389 to 0.9007               | 0.0009         |
| AURKA       | 0.7683     | 0.06995           | 0.6312 to 0.9054               | 0.001          |
| ORC6L       | 0.7683     | 0.06659           | 0.6378 to 0.8988               | 0.001          |
| SMC2        | 0.7683     | 0.07196           | 0.6273 to 0.9094               | 0.001          |
| MRE11A      | 0.7639     | 0.06909           | 0.6285 to 0.8993               | 0.0012         |
| PRKAR2B     | 0.7639     | 0.06977           | 0.6272 to 0.9007               | 0.0012         |
| LSM5        | 0.7625     | 0.06619           | 0.6327 to 0.8922               | 0.0012         |
| FOXO1       | 0.761      | 0.06654           | 0.6306 to 0.8914               | 0.0013         |
| TBC1D2B     | 0.761      | 0.0669            | 0.6299 to 0.8921               | 0.0013         |
| E2F3        | 0.7595     | 0.07046           | 0.6214 to 0.8976               | 0.0014         |

**Supporting Information Table S13. ROC analysis of 325 E2F target genes in TCGA\_C1 vs. TCGA\_C2**

| <b>Gene</b> | <b>AUC</b> | <b>Std. Error</b> | <b>95% confidence interval</b> | <b>p-value</b> |
|-------------|------------|-------------------|--------------------------------|----------------|
| RFC2        | 0.7595     | 0.06956           | 0.6232 to 0.8959               | 0.0014         |
| TMPO        | 0.7567     | 0.07184           | 0.6159 to 0.8975               | 0.0014         |
| PPM1D       | 0.7566     | 0.06987           | 0.6197 to 0.8935               | 0.0016         |
| APBB2       | 0.7551     | 0.06871           | 0.6205 to 0.8898               | 0.0017         |
| KIF2C       | 0.7546     | 0.06887           | 0.6196 to 0.8895               | 0.0015         |
| FGF2        | 0.7522     | 0.06764           | 0.6196 to 0.8848               | 0.0019         |
| HIST2H4A    | 0.7522     | 0.0693            | 0.6164 to 0.8880               | 0.0019         |
| RFC4        | 0.7507     | 0.06668           | 0.6200 to 0.8814               | 0.002          |
| VRK1        | 0.7504     | 0.06842           | 0.6162 to 0.8845               | 0.0018         |
| DNMT1       | 0.7493     | 0.07322           | 0.6058 to 0.8928               | 0.0022         |
| HIST1H3D    | 0.7493     | 0.07018           | 0.6117 to 0.8868               | 0.0022         |
| KIF20B      | 0.7493     | 0.06897           | 0.6141 to 0.8844               | 0.0022         |
| BAD         | 0.7478     | 0.06993           | 0.6107 to 0.8849               | 0.0023         |
| RAD52       | 0.7478     | 0.0681            | 0.6143 to 0.8813               | 0.0023         |
| CDKN3       | 0.7449     | 0.07136           | 0.6050 to 0.8847               | 0.0026         |
| PITX1       | 0.7449     | 0.07025           | 0.6072 to 0.8826               | 0.0026         |
| MSH2        | 0.7375     | 0.06872           | 0.6029 to 0.8722               | 0.0035         |
| PLK1        | 0.7375     | 0.07228           | 0.5959 to 0.8792               | 0.0035         |
| STMN1       | 0.7361     | 0.06786           | 0.6031 to 0.8691               | 0.0037         |
| SSX2IP      | 0.7346     | 0.06936           | 0.5987 to 0.8705               | 0.0039         |
| BMPR1A      | 0.7331     | 0.07062           | 0.5947 to 0.8716               | 0.0041         |
| UMPS        | 0.7321     | 0.07432           | 0.5865 to 0.8778               | 0.0038         |
| HIST1H2AE   | 0.7317     | 0.07141           | 0.5917 to 0.8716               | 0.0043         |
| PDGFRA      | 0.7302     | 0.07375           | 0.5856 to 0.8748               | 0.0046         |
| CCNB1       | 0.7287     | 0.07173           | 0.5882 to 0.8693               | 0.0049         |
| HMGB1       | 0.7287     | 0.06911           | 0.5933 to 0.8642               | 0.0049         |
| FOXN3       | 0.7273     | 0.07125           | 0.5876 to 0.8669               | 0.0051         |
| MAPK3       | 0.7273     | 0.07806           | 0.5743 to 0.8803               | 0.0051         |
| RB1         | 0.7273     | 0.07094           | 0.5882 to 0.8663               | 0.0051         |
| ROD1        | 0.7273     | 0.07265           | 0.5849 to 0.8697               | 0.0051         |
| NASP        | 0.7258     | 0.0718            | 0.5851 to 0.8665               | 0.0054         |
| RRM2        | 0.7258     | 0.07031           | 0.5880 to 0.8636               | 0.0054         |
| DUT         | 0.7243     | 0.07301           | 0.5812 to 0.8674               | 0.0057         |
| INCENP      | 0.7243     | 0.08092           | 0.5657 to 0.8829               | 0.0057         |
| MAP3K14     | 0.7229     | 0.07217           | 0.5814 to 0.8643               | 0.0061         |
| TNFSF9      | 0.7223     | 0.07449           | 0.5763 to 0.8683               | 0.0056         |
| BIRC5       | 0.7214     | 0.06948           | 0.5852 to 0.8576               | 0.0064         |

**Supporting Information Table S13. ROC analysis of 325 E2F target genes in TCGA\_C1 vs. TCGA\_C2**

| <b>Gene</b> | <b>AUC</b> | <b>Std. Error</b> | <b>95% confidence interval</b> | <b>p-value</b> |
|-------------|------------|-------------------|--------------------------------|----------------|
| MCM6        | 0.7185     | 0.07238           | 0.5766 to 0.8603               | 0.0072         |
| CDCA4       | 0.7155     | 0.07582           | 0.5669 to 0.8641               | 0.008          |
| CTGF        | 0.7155     | 0.07873           | 0.5612 to 0.8699               | 0.008          |
| CFLAR       | 0.7141     | 0.07446           | 0.5681 to 0.8600               | 0.0084         |
| CSRP2       | 0.7141     | 0.0758            | 0.5655 to 0.8627               | 0.0084         |
| CENPF       | 0.7111     | 0.07446           | 0.5652 to 0.8571               | 0.0093         |
| HIST1H2BO   | 0.7111     | 0.07173           | 0.5706 to 0.8517               | 0.0093         |
| SOX9        | 0.7111     | 0.07237           | 0.5693 to 0.8530               | 0.0093         |
| ASF1B       | 0.7097     | 0.07003           | 0.5724 to 0.8469               | 0.0098         |
| PAWR        | 0.7082     | 0.07373           | 0.5637 to 0.8527               | 0.0104         |
| CCND3       | 0.7053     | 0.07474           | 0.5588 to 0.8518               | 0.0115         |
| GAB2        | 0.7038     | 0.07443           | 0.5579 to 0.8497               | 0.0121         |
| ACTA2       | 0.7023     | 0.07499           | 0.5554 to 0.8493               | 0.0127         |
| HMGB3       | 0.7023     | 0.07071           | 0.5638 to 0.8409               | 0.0127         |
| ORC3L       | 0.7023     | 0.07811           | 0.5492 to 0.8554               | 0.0127         |
| TK1         | 0.7009     | 0.07532           | 0.5533 to 0.8485               | 0.0134         |
| ADAMTS1     | 0.6994     | 0.07515           | 0.5521 to 0.8467               | 0.0141         |
| OSMR        | 0.6979     | 0.07689           | 0.5472 to 0.8487               | 0.0148         |
| COL11A1     | 0.6965     | 0.07265           | 0.5541 to 0.8389               | 0.0156         |
| CBX3        | 0.6935     | 0.07157           | 0.5533 to 0.8338               | 0.0172         |
| DTYMK       | 0.6935     | 0.0806            | 0.5356 to 0.8515               | 0.0172         |
| EPS8        | 0.6935     | 0.07578           | 0.5450 to 0.8421               | 0.0172         |
| FST         | 0.6921     | 0.0774            | 0.5404 to 0.8438               | 0.018          |
| USP1        | 0.6914     | 0.07929           | 0.5360 to 0.8468               | 0.0169         |
| PCNA        | 0.6906     | 0.07192           | 0.5497 to 0.8316               | 0.0189         |
| RAD51AP1    | 0.6906     | 0.0745            | 0.5446 to 0.8366               | 0.0189         |
| HIST1H2BN   | 0.6891     | 0.0762            | 0.5398 to 0.8385               | 0.0199         |
| HIST1H2AC   | 0.6877     | 0.07405           | 0.5425 to 0.8328               | 0.0209         |
| INMT        | 0.6877     | 0.07586           | 0.5390 to 0.8364               | 0.0209         |
| MAPK4       | 0.6862     | 0.07779           | 0.5337 to 0.8387               | 0.0219         |
| HIST1H3B    | 0.6848     | 0.07764           | 0.5326 to 0.8369               | 0.0229         |
| SRPR        | 0.6848     | 0.07257           | 0.5425 to 0.8270               | 0.0229         |
| ID3         | 0.6833     | 0.07622           | 0.5339 to 0.8327               | 0.024          |
| FEN1        | 0.6818     | 0.07717           | 0.5306 to 0.8331               | 0.0252         |
| MCM7        | 0.6804     | 0.07553           | 0.5323 to 0.8284               | 0.0264         |
| AXIN2       | 0.6774     | 0.0787            | 0.5232 to 0.8317               | 0.0289         |
| CALR        | 0.6774     | 0.07477           | 0.5309 to 0.8240               | 0.0289         |

**Supporting Information Table S13. ROC analysis of 325 E2F target genes in TCGA\_C1 vs. TCGA\_C2**

| <b>Gene</b> | <b>AUC</b> | <b>Std. Error</b> | <b>95% confidence interval</b> | <b>p-value</b> |
|-------------|------------|-------------------|--------------------------------|----------------|
| CCNB2       | 0.6774     | 0.07588           | 0.5287 to 0.8261               | 0.0289         |
| KIFC1       | 0.6774     | 0.07642           | 0.5276 to 0.8272               | 0.0269         |
| HIST1H2BJ   | 0.6745     | 0.07508           | 0.5273 to 0.8216               | 0.0317         |
| ORC2L       | 0.673      | 0.07727           | 0.5216 to 0.8245               | 0.0332         |
| VIPR1       | 0.6718     | 0.07372           | 0.5273 to 0.8163               | 0.0321         |
| SFRS2       | 0.6686     | 0.07497           | 0.5217 to 0.8156               | 0.0379         |
| CDC25C      | 0.6672     | 0.07613           | 0.5179 to 0.8164               | 0.0396         |
| E2F1        | 0.6657     | 0.07536           | 0.5180 to 0.8134               | 0.0414         |
| NRP1        | 0.6642     | 0.07664           | 0.5140 to 0.8144               | 0.0432         |
| GCH1        | 0.6628     | 0.07498           | 0.5158 to 0.8097               | 0.0451         |
| TEAD4       | 0.6584     | 0.07491           | 0.5115 to 0.8052               | 0.0512         |
| CDS1        | 0.6569     | 0.07481           | 0.5103 to 0.8035               | 0.0534         |
| CITED1      | 0.6569     | 0.08186           | 0.4965 to 0.8173               | 0.0534         |
| RRM1        | 0.6569     | 0.0783            | 0.5034 to 0.8104               | 0.0534         |
| XRCC4       | 0.6564     | 0.0785            | 0.5025 to 0.8102               | 0.0511         |
| ANLN        | 0.6554     | 0.08223           | 0.4943 to 0.8166               | 0.0557         |
| PARP1       | 0.6554     | 0.07792           | 0.5027 to 0.8081               | 0.0557         |
| HIST1H2BF   | 0.654      | 0.07863           | 0.4998 to 0.8081               | 0.058          |
| POLD1       | 0.654      | 0.07474           | 0.5075 to 0.8004               | 0.058          |
| SHCBP1      | 0.654      | 0.07752           | 0.5020 to 0.8059               | 0.058          |
| SLPI        | 0.654      | 0.07713           | 0.5028 to 0.8051               | 0.058          |
| TGFB2       | 0.654      | 0.08292           | 0.4914 to 0.8165               | 0.058          |
| RPA2        | 0.6525     | 0.07839           | 0.4988 to 0.8061               | 0.0605         |
| SRGAP2      | 0.6525     | 0.07809           | 0.4994 to 0.8055               | 0.0605         |
| DBF4        | 0.651      | 0.07874           | 0.4967 to 0.8054               | 0.063          |
| GJC1        | 0.6481     | 0.08603           | 0.4795 to 0.8167               | 0.0683         |
| E2F2        | 0.6466     | 0.08414           | 0.4817 to 0.8115               | 0.0711         |
| MKI67       | 0.6466     | 0.08099           | 0.4879 to 0.8054               | 0.0711         |
| PMAIP1      | 0.6466     | 0.07547           | 0.4987 to 0.7946               | 0.0711         |
| PLSCR1      | 0.6452     | 0.0786            | 0.4911 to 0.7992               | 0.0739         |
| EZH2        | 0.6422     | 0.07975           | 0.4859 to 0.7985               | 0.08           |
| PRIM1       | 0.6422     | 0.08001           | 0.4854 to 0.7990               | 0.08           |
| RAD51       | 0.6422     | 0.07736           | 0.4906 to 0.7939               | 0.08           |
| RAD54L      | 0.6408     | 0.07672           | 0.4904 to 0.7911               | 0.0831         |
| KPNA2       | 0.6393     | 0.08168           | 0.4792 to 0.7994               | 0.0864         |
| HRK         | 0.6378     | 0.08195           | 0.4772 to 0.7985               | 0.0897         |
| TCOF1       | 0.6378     | 0.07701           | 0.4869 to 0.7888               | 0.0897         |

**Supporting Information Table S13. ROC analysis of 325 E2F target genes in TCGA\_C1 vs. TCGA\_C2**

| <b>Gene</b> | <b>AUC</b> | <b>Std. Error</b> | <b>95% confidence interval</b> | <b>p-value</b> |
|-------------|------------|-------------------|--------------------------------|----------------|
| TIMELESS    | 0.6378     | 0.07638           | 0.4881 to 0.7875               | 0.0897         |
| BLM         | 0.6364     | 0.0772            | 0.4851 to 0.7877               | 0.0932         |
| CDKN2C      | 0.6364     | 0.0778            | 0.4839 to 0.7888               | 0.0932         |
| CASP7       | 0.6349     | 0.07766           | 0.4827 to 0.7871               | 0.0968         |
| MAP2K1      | 0.6349     | 0.08146           | 0.4752 to 0.7945               | 0.0968         |
| NUP107      | 0.6349     | 0.07746           | 0.4831 to 0.7867               | 0.0968         |
| HIST1H2AD   | 0.6342     | 0.08091           | 0.4756 to 0.7927               | 0.0986         |
| HIST1H2BE   | 0.6334     | 0.07923           | 0.4781 to 0.7887               | 0.1005         |
| DNA2        | 0.632      | 0.07846           | 0.4782 to 0.7857               | 0.1042         |
| MYC         | 0.6305     | 0.07756           | 0.4785 to 0.7825               | 0.1082         |
| PEX19       | 0.629      | 0.07789           | 0.4764 to 0.7817               | 0.1122         |
| PRPS1       | 0.6276     | 0.07903           | 0.4727 to 0.7825               | 0.1163         |
| FAS         | 0.6261     | 0.07822           | 0.4728 to 0.7794               | 0.1206         |
| NOLC1       | 0.6261     | 0.07905           | 0.4712 to 0.7810               | 0.1206         |
| ASH2L       | 0.6246     | 0.0774            | 0.4729 to 0.7763               | 0.1249         |
| CENPE       | 0.6246     | 0.08126           | 0.4654 to 0.7839               | 0.1249         |
| PBK         | 0.6232     | 0.07813           | 0.4700 to 0.7763               | 0.1294         |
| SPHK1       | 0.6232     | 0.0815            | 0.4634 to 0.7829               | 0.1294         |
| TGFB3       | 0.6232     | 0.07899           | 0.4684 to 0.7780               | 0.1294         |
| NFKB2       | 0.6217     | 0.08065           | 0.4636 to 0.7798               | 0.1341         |
| HOXA9       | 0.6202     | 0.0815            | 0.4605 to 0.7800               | 0.1388         |
| SFPQ        | 0.6173     | 0.07753           | 0.4653 to 0.7693               | 0.1487         |
| BBC3        | 0.6158     | 0.08125           | 0.4566 to 0.7751               | 0.1539         |
| CASP8       | 0.6158     | 0.07872           | 0.4616 to 0.7701               | 0.1539         |
| CASP3       | 0.6144     | 0.07924           | 0.4591 to 0.7697               | 0.1591         |
| CSTF1       | 0.6144     | 0.0819            | 0.4538 to 0.7749               | 0.1591         |
| MELK        | 0.6144     | 0.08163           | 0.4544 to 0.7744               | 0.1591         |
| BUB3        | 0.6114     | 0.07823           | 0.4581 to 0.7648               | 0.1701         |
| NRBP2       | 0.6114     | 0.07846           | 0.4577 to 0.7652               | 0.1701         |
| DDB2        | 0.61       | 0.08085           | 0.4515 to 0.7684               | 0.1758         |
| GADD45B     | 0.61       | 0.08267           | 0.4479 to 0.7720               | 0.1758         |
| PBX3        | 0.61       | 0.07917           | 0.4548 to 0.7651               | 0.1758         |
| CHAF1A      | 0.6085     | 0.07857           | 0.4545 to 0.7625               | 0.1816         |
| PRG4        | 0.6085     | 0.07941           | 0.4529 to 0.7641               | 0.1816         |
| KIF11       | 0.607      | 0.07961           | 0.4510 to 0.7631               | 0.1876         |
| NEK2        | 0.6056     | 0.07983           | 0.4491 to 0.7620               | 0.1937         |
| TP73        | 0.6045     | 0.07867           | 0.4503 to 0.7587               | 0.1925         |

**Supporting Information Table S13. ROC analysis of 325 E2F target genes in TCGA\_C1 vs. TCGA\_C2**

| <b>Gene</b> | <b>AUC</b> | <b>Std. Error</b> | <b>95% confidence interval</b> | <b>p-value</b> |
|-------------|------------|-------------------|--------------------------------|----------------|
| ANXA8       | 0.6041     | 0.08028           | 0.4468 to 0.7614               | 0.2            |
| PDCD4       | 0.6041     | 0.07786           | 0.4515 to 0.7567               | 0.2            |
| HUNK        | 0.6026     | 0.0804            | 0.4451 to 0.7602               | 0.2064         |
| RFC3        | 0.6026     | 0.07779           | 0.4502 to 0.7551               | 0.2064         |
| RANBP9      | 0.5982     | 0.08127           | 0.4390 to 0.7575               | 0.2265         |
| CCND1       | 0.5968     | 0.08041           | 0.4392 to 0.7544               | 0.2335         |
| LMNB1       | 0.5968     | 0.07876           | 0.4424 to 0.7511               | 0.2335         |
| TTK         | 0.5961     | 0.08334           | 0.4327 to 0.7594               | 0.2308         |
| HMGB2       | 0.5953     | 0.08377           | 0.4311 to 0.7595               | 0.2407         |
| KIF20A      | 0.5953     | 0.08209           | 0.4344 to 0.7562               | 0.2407         |
| MCM5        | 0.5909     | 0.07864           | 0.4368 to 0.7450               | 0.2631         |
| PLK4        | 0.5909     | 0.07913           | 0.4358 to 0.7460               | 0.2631         |
| CCNF        | 0.5865     | 0.07911           | 0.4315 to 0.7416               | 0.2869         |
| FGFR10P     | 0.5865     | 0.08293           | 0.4240 to 0.7491               | 0.2869         |
| VEGFA       | 0.5863     | 0.08004           | 0.4294 to 0.7431               | 0.282          |
| HMMR        | 0.585      | 0.08214           | 0.4240 to 0.7460               | 0.2951         |
| HNRNPC      | 0.585      | 0.08116           | 0.4260 to 0.7441               | 0.2951         |
| HSP90B1     | 0.585      | 0.07961           | 0.4290 to 0.7411               | 0.2951         |
| TCF19       | 0.585      | 0.07886           | 0.4305 to 0.7396               | 0.2951         |
| APOE        | 0.5836     | 0.08099           | 0.4248 to 0.7423               | 0.3035         |
| MCL1        | 0.5821     | 0.0839            | 0.4177 to 0.7465               | 0.3121         |
| POLE2       | 0.5806     | 0.08225           | 0.4194 to 0.7419               | 0.3208         |
| CDK1        | 0.5792     | 0.08002           | 0.4223 to 0.7360               | 0.3297         |
| DEK         | 0.5792     | 0.0852            | 0.4122 to 0.7462               | 0.3297         |
| SERPINE1    | 0.5792     | 0.08352           | 0.4155 to 0.7429               | 0.3297         |
| BMI1        | 0.5777     | 0.08063           | 0.4197 to 0.7357               | 0.3387         |
| PRC1        | 0.5777     | 0.08383           | 0.4134 to 0.7420               | 0.3387         |
| CPT1A       | 0.5762     | 0.08464           | 0.4103 to 0.7421               | 0.3479         |
| GIN51       | 0.5762     | 0.08              | 0.4195 to 0.7330               | 0.3479         |
| CHAF1B      | 0.5748     | 0.07982           | 0.4183 to 0.7312               | 0.3573         |
| CDKN1C      | 0.5733     | 0.08123           | 0.4141 to 0.7325               | 0.3668         |
| CSDA        | 0.5733     | 0.08056           | 0.4154 to 0.7312               | 0.3668         |
| RAD51C      | 0.5733     | 0.0813            | 0.4140 to 0.7327               | 0.3668         |
| PRIM2       | 0.5689     | 0.08153           | 0.4091 to 0.7287               | 0.3962         |
| TYMS        | 0.568      | 0.07875           | 0.4137 to 0.7224               | 0.3962         |
| FGFR3       | 0.566      | 0.08279           | 0.4037 to 0.7282               | 0.4166         |
| ENO3        | 0.5645     | 0.08028           | 0.4072 to 0.7219               | 0.4271         |

**Supporting Information Table S13. ROC analysis of 325 E2F target genes in TCGA\_C1 vs. TCGA\_C2**

| <b>Gene</b> | <b>AUC</b> | <b>Std. Error</b> | <b>95% confidence interval</b> | <b>p-value</b> |
|-------------|------------|-------------------|--------------------------------|----------------|
| BUB1        | 0.563      | 0.08419           | 0.3980 to 0.7281               | 0.4376         |
| BTG3        | 0.5616     | 0.07904           | 0.4067 to 0.7165               | 0.4484         |
| HOXA7       | 0.5616     | 0.07975           | 0.4053 to 0.7179               | 0.4484         |
| MLH1        | 0.5601     | 0.08163           | 0.4001 to 0.7201               | 0.4592         |
| FANCL       | 0.5587     | 0.08138           | 0.3991 to 0.7182               | 0.4703         |
| MAD2L1      | 0.5572     | 0.0809            | 0.3986 to 0.7158               | 0.4814         |
| BUB1B       | 0.5557     | 0.08371           | 0.3917 to 0.7198               | 0.4928         |
| MCM3        | 0.5557     | 0.08134           | 0.3963 to 0.7151               | 0.4928         |
| PLK2        | 0.5543     | 0.08348           | 0.3906 to 0.7179               | 0.5042         |
| TGFA        | 0.5543     | 0.08309           | 0.3914 to 0.7171               | 0.5042         |
| SERPINF2    | 0.5513     | 0.08271           | 0.3892 to 0.7134               | 0.5275         |
| FURIN       | 0.5499     | 0.08128           | 0.3906 to 0.7092               | 0.5394         |
| MAF         | 0.5484     | 0.08095           | 0.3897 to 0.7070               | 0.5514         |
| SULT2A1     | 0.5469     | 0.08023           | 0.3897 to 0.7042               | 0.5635         |
| TPX2        | 0.5456     | 0.0805            | 0.3878 to 0.7034               | 0.5697         |
| BMP2        | 0.5455     | 0.08013           | 0.3884 to 0.7025               | 0.5758         |
| CCNE2       | 0.5455     | 0.08329           | 0.3822 to 0.7087               | 0.5758         |
| LIG1        | 0.5455     | 0.08059           | 0.3875 to 0.7034               | 0.5758         |
| MFAP1       | 0.5425     | 0.08163           | 0.3825 to 0.7025               | 0.6006         |
| UHRF1       | 0.5414     | 0.08364           | 0.3774 to 0.7053               | 0.6058         |
| RFC5        | 0.5411     | 0.0825            | 0.3794 to 0.7028               | 0.6133         |
| CDK2        | 0.5396     | 0.08428           | 0.3744 to 0.7048               | 0.626          |
| GRAMD4      | 0.5396     | 0.08373           | 0.3755 to 0.7037               | 0.626          |
| UNG         | 0.5386     | 0.08201           | 0.3778 to 0.6993               | 0.6305         |
| CDC7        | 0.5381     | 0.08108           | 0.3792 to 0.6970               | 0.6388         |
| ECT2        | 0.5381     | 0.08232           | 0.3768 to 0.6995               | 0.6388         |
| SMC4        | 0.5381     | 0.08221           | 0.3770 to 0.6993               | 0.6388         |
| ISYNA1      | 0.5367     | 0.08384           | 0.3723 to 0.7010               | 0.6518         |
| RACGAP1     | 0.5367     | 0.08414           | 0.3718 to 0.7016               | 0.6518         |
| CDC25A      | 0.5352     | 0.08113           | 0.3762 to 0.6942               | 0.6649         |
| SNAPC1      | 0.5337     | 0.08438           | 0.3683 to 0.6991               | 0.678          |
| BCL3        | 0.5323     | 0.0818            | 0.3719 to 0.6926               | 0.6913         |
| BID         | 0.5323     | 0.08537           | 0.3649 to 0.6996               | 0.6913         |
| YY1         | 0.5316     | 0.08926           | 0.3566 to 0.7065               | 0.6939         |
| GADD45A     | 0.5308     | 0.08487           | 0.3644 to 0.6971               | 0.7046         |
| POLA2       | 0.5308     | 0.08231           | 0.3695 to 0.6921               | 0.7046         |
| CBFB        | 0.5279     | 0.08218           | 0.3668 to 0.6889               | 0.7316         |

**Supporting Information Table S13. ROC analysis of 325 E2F target genes in TCGA\_C1 vs. TCGA\_C2**

| <b>Gene</b> | <b>AUC</b> | <b>Std. Error</b> | <b>95% confidence interval</b> | <b>p-value</b> |
|-------------|------------|-------------------|--------------------------------|----------------|
| CHEK1       | 0.5279     | 0.08699           | 0.3574 to 0.6984               | 0.7316         |
| PPP1R13B    | 0.5279     | 0.08283           | 0.3655 to 0.6902               | 0.7316         |
| CCNO        | 0.5249     | 0.08586           | 0.3566 to 0.6932               | 0.7589         |
| PMS2        | 0.5249     | 0.08198           | 0.3643 to 0.6856               | 0.7589         |
| KBTBD10     | 0.5235     | 0.08091           | 0.3649 to 0.6820               | 0.7727         |
| CENPK       | 0.5205     | 0.07942           | 0.3649 to 0.6762               | 0.8005         |
| CDCA7L      | 0.5191     | 0.08349           | 0.3554 to 0.6827               | 0.8145         |
| LHX2        | 0.5191     | 0.08318           | 0.3560 to 0.6821               | 0.8145         |
| RPA1        | 0.5191     | 0.08058           | 0.3611 to 0.6770               | 0.8145         |
| TOPBP1      | 0.5189     | 0.08565           | 0.3511 to 0.6868               | 0.8133         |
| DMRT1       | 0.5183     | 0.08182           | 0.3580 to 0.6787               | 0.8215         |
| MTHFD1      | 0.5176     | 0.08525           | 0.3505 to 0.6847               | 0.8285         |
| CAV1        | 0.5161     | 0.08626           | 0.3471 to 0.6852               | 0.8426         |
| KIF4A       | 0.5161     | 0.08267           | 0.3541 to 0.6782               | 0.8406         |
| MCM2        | 0.5147     | 0.08166           | 0.3546 to 0.6747               | 0.8568         |
| FOXM1       | 0.5117     | 0.0804            | 0.3541 to 0.6693               | 0.8852         |
| SLBP        | 0.5103     | 0.0821            | 0.3493 to 0.6712               | 0.8994         |
| TGFB1I1     | 0.5103     | 0.08355           | 0.3465 to 0.6740               | 0.8994         |
| EED         | 0.5088     | 0.08199           | 0.3481 to 0.6695               | 0.9138         |
| HEY1        | 0.5088     | 0.08829           | 0.3358 to 0.6818               | 0.9138         |
| CCNA2       | 0.5073     | 0.08001           | 0.3505 to 0.6641               | 0.9281         |
| NDC80       | 0.5073     | 0.08153           | 0.3475 to 0.6671               | 0.9281         |
| NUSAP1      | 0.5073     | 0.0826            | 0.3454 to 0.6692               | 0.9281         |
| CDC6        | 0.5029     | 0.08508           | 0.3362 to 0.6697               | 0.9712         |
| MAPK9       | 0.5029     | 0.0825            | 0.3412 to 0.6646               | 0.9712         |
| PLAU        | 0.5015     | 0.08479           | 0.3353 to 0.6677               | 0.9856         |
| SIRPA       | 0.5015     | 0.0827            | 0.3394 to 0.6636               | 0.9856         |
| HIST1H3E    | 0.5        | 0.08371           | 0.3359 to 0.6641               | >0.9999        |
